# Supplementary material
Source: HighWire-hosted journal article supplement (https://www.annfammed.org/highwire/filestream/8814/field_highwire_adjunct_files/0/Arthur_Supp_App.pdf)
Supplement: Arthur_Supp_App.pdf [file Arthur_Supp_App.pdf]

**Supplemental materials for:**

Arthur KC, Lucenko B, Sharkova I, Xing J, Mangione-Smith R. Using state administrative data to identify social complexity risk factors for children. *Ann Fam Med*. 2018;16(1):62-69.

**Supplemental Appendix 1: Codes for Identifying Mental Health and Substance Abuse Service Needs**

| Description                                                                                                            | Codes or Categories                                                                                                                                                                                                                                                                                                                                                                                                                                                                                                                         |
|------------------------------------------------------------------------------------------------------------------------|---------------------------------------------------------------------------------------------------------------------------------------------------------------------------------------------------------------------------------------------------------------------------------------------------------------------------------------------------------------------------------------------------------------------------------------------------------------------------------------------------------------------------------------------|
| <b>ICD-9-CM mental illness diagnosis: psychotic, bipolar, depression, anxiety, ADHD, conduct, impulse, adjustment</b>  | 295-295.99, 297-297.99, 298-298.99, 293.81-293.82, 301.13, 296-296.19, 296.4-296.99, 293.83-293.83, 296.2-296.29, 296.3 -296.39, 300.4-300.49, 300.5-300.59, 311-311.99, 309.81-309.89, 309.9, 313.81,312-312.99, 314.1-314.99, 309.24-309.8 , 309-309.20                                                                                                                                                                                                                                                                                   |
| <b>Mental health medication categories</b>                                                                             | Antipsychotic, antimania, antidepressant, antianxiety, ADHD                                                                                                                                                                                                                                                                                                                                                                                                                                                                                 |
| <b>State-specific mental health service categories</b>                                                                 | Community mental health (outpatient), community psychiatric hospitalization (inpatient), state hospital (includes long-term inpatient, forensic evaluation), crisis service                                                                                                                                                                                                                                                                                                                                                                 |
| <b>ICD-9-CM substance-related diagnosis</b>                                                                            | 291, 292, 303, 304, 305, 571.1, 648.3 (305.1 is not included)                                                                                                                                                                                                                                                                                                                                                                                                                                                                               |
| <b>ICD-9 procedure code: rehabilitation</b>                                                                            | 94.53, 94.61, 94.63, 94.64, 94.66, 94.67, 94.69                                                                                                                                                                                                                                                                                                                                                                                                                                                                                             |
| <b>Alcohol or Drug Treatment DRG</b>                                                                                   | 433, 434, 435, 436, 437, 743, 744, 745, 746, 747, 748, 749, 750, 751                                                                                                                                                                                                                                                                                                                                                                                                                                                                        |
| <b>Substance-related services recorded in medical claims, including state specific codes in appropriate categories</b> | Residential substance abuse treatment, individual substance abuse treatment, group substance abuse treatment, opiate substitution treatment (J1230), substance-related acupuncture, other substance-related therapy or service (T1009, T1028), detox and related services (116, 126, 136, 146, 156, 168, 94.62, 94.65, 94.68, H0008, H0009, H0010, H0011, H0012, H0013, H0014), substance abuse intake/assessment (H0001), detox billing provider type, urinalysis (substance-related; H0002, H0003, 80100), case management (H0006, T1017) |
| <b>Arrests</b>                                                                                                         | Arrests recorded in the following categories: alcohol violations; manufacturing, distribution, possession of controlled substance or paraphernalia; driving while under the influence; Violation Uniform Controlled Substance Act (VUCSA); Violation of the Washington State Uniform Legend Drug Act (VULDA)                                                                                                                                                                                                                                |
